# Supplementary material for: Specialisation of meiotic kinetochores revealed through a synthetic spindle assembly checkpoint strategy
Source: bioRxiv preprint, doi:10.1101/2025.08.28.672825, version 2 (2026-03-05)
Supplement: Supplemental Table 1 [file 672825_file03.xlsx]

## Sheet: Sheet1
Plasmid Number	Description	Yeast selection	E coli selection
AMp1725	mps1(440-765)	HIS3	amp
AMp1740	pMPS1-mps1(440-765)	HIS3	amp
AMp1741	pSPC105-spc105(1-455)-PYL-3FLAG	LEU2	amp
AMp1755	pMPS1-mps1(440-765)-ABI	HIS3	amp
AMp2055	pSPC105-spc105(1-455)-PYL	LEU2	amp
AMp2314	pSPC105-spc105(1-455)-RASA-PYL-3FLAG	LEU2	amp
AMp2331	pMPS1-mps1(440-765)-ABI-3V5	HIS3	amp
AMp2332	pSPC105-spc105(1-455)-4A-RASA-PYL-3FLAG	LEU2	amp
AMp2352	pSPC105-spc105(1-455)-RVAF-PYL-3FLAG	LEU2	amp
AMp2355	pSPC105-spc105(1-455)-4A-PYL-3FLAG	LEU2	amp
